# Supplementary material for: Prognostic implications of cell division cycle protein 45 expression in hepatocellular carcinoma
Source: PeerJ journal article supplement (doi:10.7717/peerj.10824), 2021-02-12
Supplement: supplement_7_File.zip [file supplement_7_File.zip]

## Sheet: Sheet1
	Estimate	Std. Error	t value	Pr(>|t|)
Metastasis	-0.420726	0.140375	-2.99715	0.00329265
Edmondson grade	-0.263026	0.0790117	-3.32895	0.00114816
CDC45 expression	0.00273713	0.000852876	3.20929	0.0016941
