# Supplementary figures and images for: Prognostic implications of cell division cycle protein 45 expression in hepatocellular carcinoma
Source: PeerJ journal article supplement (doi:10.7717/peerj.10824), 2021-02-12

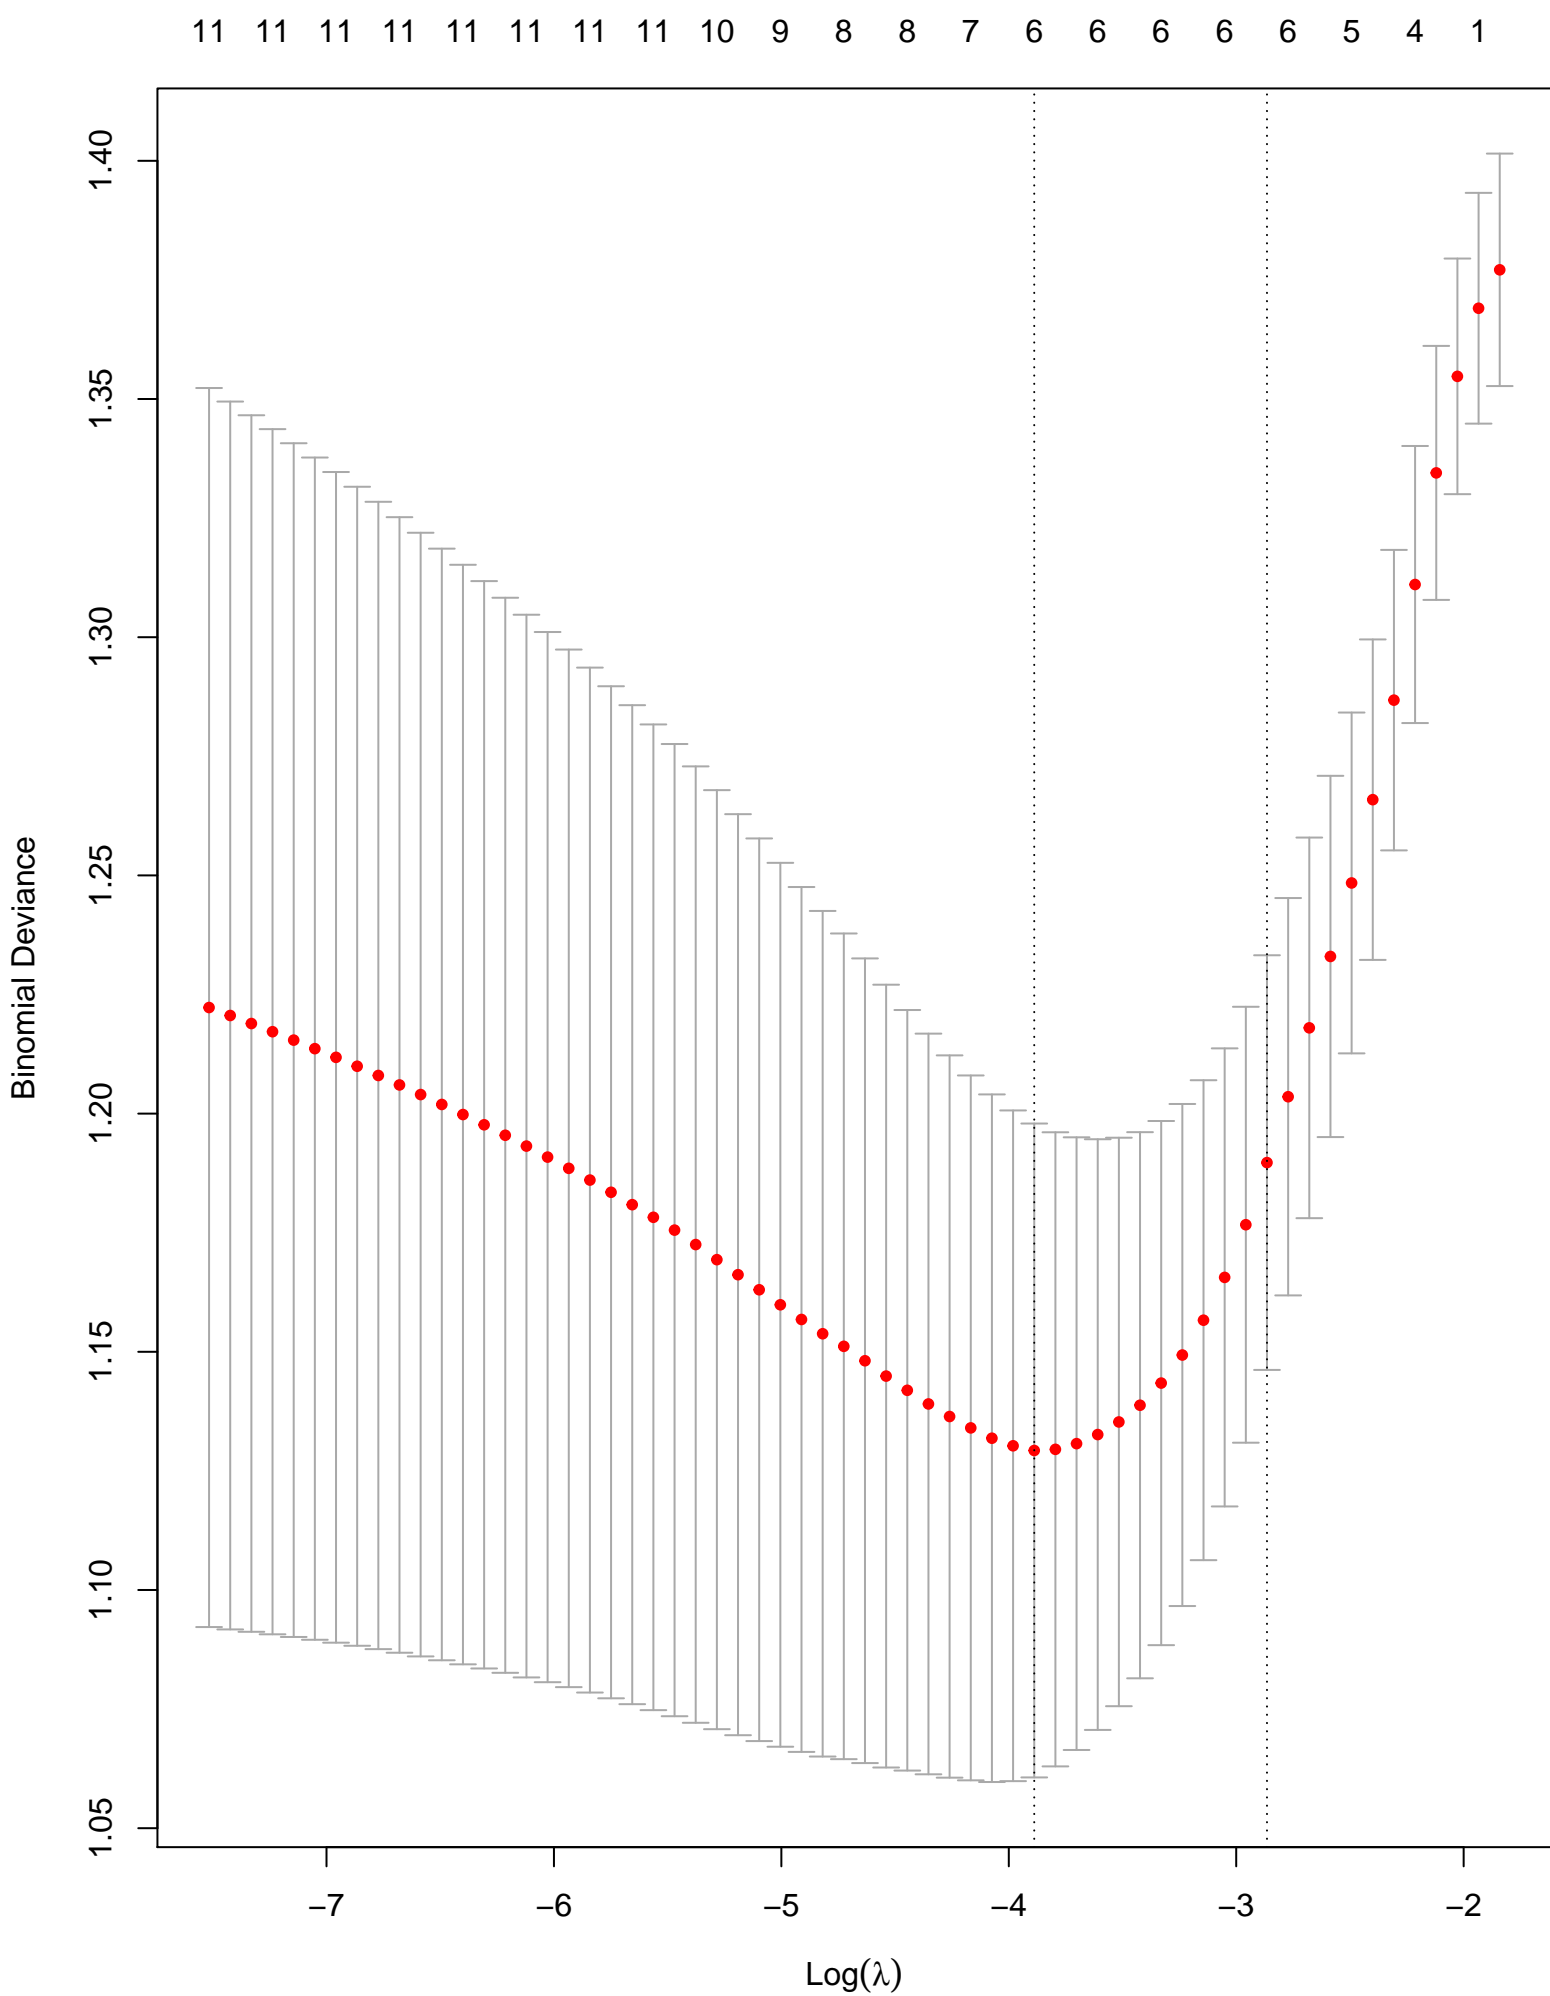

Supplement: supplement_7_File.zip [file supplement_7_File.zip]
